# Supplementary material
Source: HighWire-hosted journal article supplement (https://www.jrheum.org/highwire/filestream/39898/field_highwire_adjunct_files/0/200486DataSuppl.pdf)
Supplement: 200486DataSuppl.pdf [file 200486DataSuppl.pdf]

## ONLINE SUPPLEMENTARY MATERIAL

### Supplementary Figure 1: Study Design

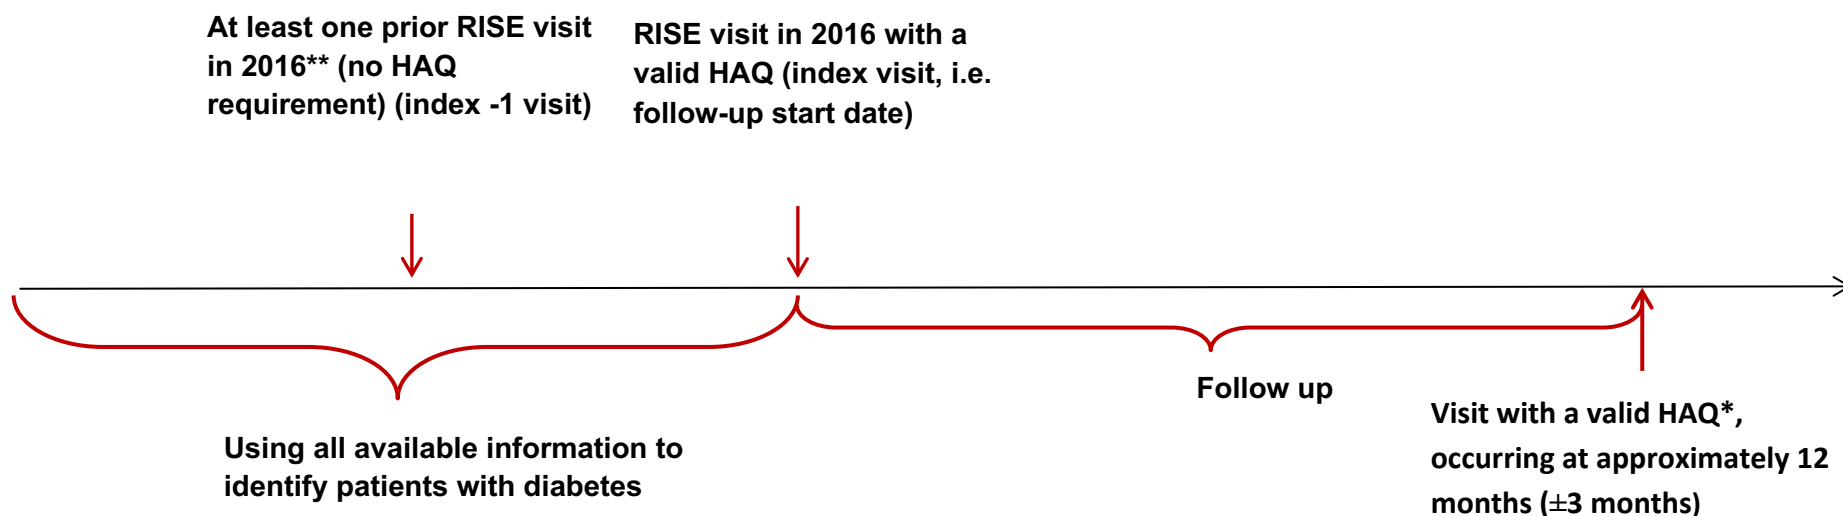

\*A valid HAQ measurement was defined as values in the data that conformed to HAQ (0-3 or 0-24), HAQ II (0-3 or 0-24), MHAQ (0-3 or 0-24), or MDHAQ (0-3 or 0-10 or 0-30).

\*\* Some patients also have RISE visit from 2015.

**Supplementary Table 1: Generalized Linear Regression Results for HAQ Change<sup>§</sup>**

| <b>Variables</b>           | <b>Crude</b>        | <b>Age, gender, race adjusted model</b> | <b>Final adjusted model</b> | <b>Final adjusted model with baseline HAQ &lt;0.5</b> | <b>Final adjusted model with baseline HAQ ≥0.5, but &lt;1.0</b> | <b>Final adjusted model with baseline HAQ ≥1.0, but &lt;3.0</b> |
|----------------------------|---------------------|-----------------------------------------|-----------------------------|-------------------------------------------------------|-----------------------------------------------------------------|-----------------------------------------------------------------|
| <b>Diabetes</b>            |                     |                                         |                             |                                                       |                                                                 |                                                                 |
| <b>Yes</b>                 | 0.01 (-0.00-0.03)   | 0.01 (-0.01-0.02)                       | 0.03 ( 0.01-0.04)           | 0.01 (-0.01-0.02)                                     | 0.03 ( 0.01- 0.06)                                              | 0.04 ( 0.00- 0.08)                                              |
| <b>Demographic Factors</b> |                     |                                         |                             |                                                       |                                                                 |                                                                 |
| <b>Age, years</b>          | 0.00 ( 0.00-0.00)   |                                         | 0.00 ( 0.00-0.00)           | -0.00 (-0.00-0.00)                                    | 0.00 ( 0.00- 0.00)                                              | 0.00 ( 0.00- 0.00)                                              |
| <b>Sex</b>                 |                     |                                         |                             |                                                       |                                                                 |                                                                 |
| <b>Male</b>                | 0.01 (-0.00-0.03)   |                                         | -0.01 (-0.02-0.01)          | -0.01 (-0.03-0.00)                                    | 0.01 (-0.02- 0.04)                                              | 0.01 (-0.03- 0.04)                                              |
| <b>Female</b>              | Ref                 |                                         | Ref                         | Ref                                                   | Ref                                                             | Ref                                                             |
| <b>Race</b>                |                     |                                         |                             |                                                       |                                                                 |                                                                 |
| <b>Black</b>               | -0.03 (-0.05--0.00) |                                         | -0.00 (-0.03-0.02)          | 0.01 (-0.01-0.04)                                     | 0.01 (-0.03- 0.04)                                              | -0.02 (-0.07-0.04)                                              |
| <b>NA</b>                  | 0.03 ( 0.01-0.05)   |                                         | 0.08 ( 0.07-0.10)           | 0.10 ( 0.08- 0.12)                                    | 0.16 ( 0.13- 0.20)                                              | 0.01 (-0.03- 0.06)                                              |
| <b>Other</b>               | -0.04 (-0.07--0.01) |                                         | 0.02 (-0.00-0.05)           | 0.02 (-0.01-0.05)                                     | 0.02 (-0.03- 0.06)                                              | 0.03 (-0.03- 0.09)                                              |
| <b>White</b>               | Ref                 |                                         | Ref                         | Ref                                                   | Ref                                                             | Ref                                                             |

| Variables                                | Crude               | Age, gender, race adjusted model | Final adjusted model | Final adjusted model with baseline HAQ <0.5 | Final adjusted model with baseline HAQ ≥0.5, but <1.0 | Final adjusted model with baseline HAQ ≥1.0, but <3.0 |
|------------------------------------------|---------------------|----------------------------------|----------------------|---------------------------------------------|-------------------------------------------------------|-------------------------------------------------------|
| <b>Index visit HAQ category</b>          |                     |                                  |                      |                                             |                                                       |                                                       |
| <b>0-&lt;0.5</b>                         | 0.44 ( 0.42-0.45)   | 0.45 ( 0.43-0.46)                | 0.49 ( 0.48-0.51)    | N/A                                         | N/A                                                   | N/A                                                   |
| <b>0.5-&lt;1.0</b>                       | 0.34 ( 0.32-0.35)   | 0.34 ( 0.32-0.35)                | 0.36 ( 0.34-0.37)    |                                             |                                                       |                                                       |
| <b>1-3</b>                               | Ref                 | Ref                              | Ref                  |                                             |                                                       |                                                       |
| <b>Glucocorticoids, current use*</b>     |                     |                                  |                      |                                             |                                                       |                                                       |
| <b>Yes</b>                               | -0.02 (-0.03--0.01) | -0.02 (-0.03--0.01)              | -0.00 (-0.01-0.01)   | 0.02 ( 0.00- 0.03)                          | 0.01 (-0.02- 0.03)                                    | -0.03 (-0.06-0.01)                                    |
| <b>Non-Biologic DMARDs, current use*</b> |                     |                                  |                      |                                             |                                                       |                                                       |
| <b>Yes</b>                               | -0.02 (-0.03--0.01) | -0.02 (-0.03--0.01)              | -0.01 (-0.02-0.01)   | 0.01 (-0.01-0.03)                           | -0.02 (-0.04-0.01)                                    | -0.02 (-0.05-0.02)                                    |
| <b>Anti-TNF biologic, current use*</b>   |                     |                                  |                      |                                             |                                                       |                                                       |
| <b>Adalimumab</b>                        | -0.04 (-0.06--0.01) | -0.03 (-0.05-0.00)               | -0.04 (-0.06--0.01)  | -0.03 (-0.06-0.00)                          | -0.01 (-0.07-0.04)                                    | -0.05 (-0.13-0.02)                                    |
| <b>Etanercept</b>                        | 0.00 (-0.02-0.03)   | 0.01 (-0.01-0.04)                | -0.01 (-0.04-0.02)   | -0.02 (-0.04-0.01)                          | -0.01 (-0.06-0.04)                                    | 0.02 (-0.05- 0.08)                                    |

| <b>Variables</b>                           | <b>Crude</b>        | <b>Age, gender, race adjusted model</b> | <b>Final adjusted model</b> | <b>Final adjusted model with baseline HAQ &lt;0.5</b> | <b>Final adjusted model with baseline HAQ ≥0.5, but &lt;1.0</b> | <b>Final adjusted model with baseline HAQ ≥1.0, but &lt;3.0</b> |
|--------------------------------------------|---------------------|-----------------------------------------|-----------------------------|-------------------------------------------------------|-----------------------------------------------------------------|-----------------------------------------------------------------|
| <b>Infliximab</b>                          | -0.02 (-0.04-0.00)  | -0.02 (-0.05-0.00)                      | -0.03 (-0.06--0.01)         | -0.04 (-0.07--0.01)                                   | -0.01 (-0.05-0.04)                                              | -0.02 (-0.08-0.04)                                              |
| <b>Certolizumab</b>                        | -0.01 (-0.05-0.04)  | -0.01 (-0.05-0.04)                      | -0.02 (-0.06-0.02)          | -0.03 (-0.07-0.02)                                    | -0.01 (-0.09-0.07)                                              | 0.01 (-0.10- 0.12)                                              |
| <b>Golimumab</b>                           | -0.03 (-0.07-0.01)  | -0.03 (-0.07-0.01)                      | -0.00 (-0.05-0.04)          | -0.00 (-0.05-0.05)                                    | -0.00 (-0.08-0.07)                                              | 0.00 (-0.09- 0.09)                                              |
| <b>Non-Anti-TNF biologic, current use*</b> |                     |                                         |                             |                                                       |                                                                 |                                                                 |
| <b>Abatacept</b>                           | -0.02 (-0.05-0.01)  | -0.02 (-0.05-0.00)                      | 0.01 (-0.02-0.04)           | 0.03 (-0.01-0.07)                                     | 0.04 (-0.02- 0.09)                                              | -0.03 (-0.10-0.04)                                              |
| <b>Rituximab</b>                           | -0.07 (-0.11--0.03) | -0.06 (-0.11--0.02)                     | -0.02 (-0.06-0.02)          | -0.02 (-0.08-0.03)                                    | 0.00 (-0.08- 0.09)                                              | -0.02 (-0.12-0.07)                                              |
| <b>Tocilizumab</b>                         | -0.05 (-0.09--0.02) | -0.05 (-0.08--0.02)                     | -0.01 (-0.04-0.03)          | 0.00 (-0.04-0.05)                                     | 0.02 (-0.05- 0.09)                                              | -0.01 (-0.09-0.07)                                              |
| <b>Tofacitinib</b>                         | -0.06 (-0.11--0.02) | -0.06 (-0.10--0.02)                     | -0.02 (-0.06-0.02)          | 0.01 (-0.03-0.06)                                     | 0.06 (-0.01- 0.13)                                              | -0.08 (-0.17-0.00)                                              |
| <b>Health Insurance</b>                    |                     |                                         |                             |                                                       |                                                                 |                                                                 |
| <b>Medicare</b>                            |                     |                                         |                             |                                                       |                                                                 |                                                                 |
| <b>Yes</b>                                 | 0.02 ( 0.01-0.03)   | -0.01 (-0.02-0.01)                      | 0.03 ( 0.02-0.05)           | 0.03 ( 0.01- 0.05)                                    | 0.01 (-0.02- 0.04)                                              | 0.05 ( 0.01- 0.09)                                              |
| <b>Medicaid</b>                            |                     |                                         |                             |                                                       |                                                                 |                                                                 |

| Variables                   | Crude              | Age, gender, race adjusted model | Final adjusted model | Final adjusted model with baseline HAQ <0.5 | Final adjusted model with baseline HAQ ≥0.5, but <1.0 | Final adjusted model with baseline HAQ ≥1.0, but <3.0 |
|-----------------------------|--------------------|----------------------------------|----------------------|---------------------------------------------|-------------------------------------------------------|-------------------------------------------------------|
| <b>Yes</b>                  | -0.00 (-0.03-0.03) | 0.01 (-0.02-0.04)                | 0.06 ( 0.03-0.09)    | 0.02 (-0.03-0.07)                           | 0.11 ( 0.05- 0.17)                                    | 0.04 (-0.02- 0.10)                                    |
| <b>Commercial/Other</b>     |                    |                                  |                      |                                             |                                                       |                                                       |
| <b>Yes</b>                  | -0.03 (-0.06-0.00) | -0.03 (-0.06-0.00)               | -0.02 (-0.05-0.01)   | 0.02 (-0.01-0.06)                           | -0.03 (-0.08-0.03)                                    | -0.05 (-0.13-0.02)                                    |
| <b>US Region</b>            |                    |                                  |                      |                                             |                                                       |                                                       |
| <b>Midwest</b>              | -0.00 (-0.02-0.01) | 0.00 (-0.01-0.02)                | 0.04 ( 0.02-0.05)    | 0.02 ( 0.00- 0.03)                          | 0.06 ( 0.03- 0.09)                                    | 0.04 (-0.00- 0.08)                                    |
| <b>Northeast</b>            | 0.05 ( 0.02-0.09)  | 0.06 ( 0.02-0.09)                | 0.07 ( 0.04-0.10)    | 0.15 ( 0.12- 0.19)                          | -0.07 (-0.13--0.01)                                   | 0.03 (-0.06- 0.12)                                    |
| <b>West</b>                 | -0.06 (-0.12-0.00) | -0.07 (-0.13--0.01)              | 0.01 (-0.04-0.07)    | -0.01 (-0.08-0.06)                          | -0.19 (-0.33--0.05)                                   | 0.09 (-0.02- 0.19)                                    |
| <b>NA</b>                   | -0.03 (-0.14-0.07) | -0.05 (-0.16-0.05)               | -0.11 (-0.20--0.01)  | -0.06 (-0.14-0.02)                          | -0.07 (-0.36-0.23)                                    | -0.19 (-0.50-0.13)                                    |
| <b>South</b>                | Ref                | Ref                              | Ref                  | Ref                                         | Ref                                                   | Ref                                                   |
| <b>History of infection</b> |                    |                                  |                      |                                             |                                                       |                                                       |
| <b>Yes</b>                  | 0.02 ( 0.01-0.04)  | 0.02 ( 0.01-0.04)                | 0.03 ( 0.02-0.04)    | 0.01 (-0.00-0.03)                           | 0.02 (-0.01- 0.04)                                    | 0.06 ( 0.03- 0.09)                                    |
| <b>Comorbidities</b>        |                    |                                  |                      |                                             |                                                       |                                                       |
| <b>Depression</b>           | 0.01 (-0.02-0.04)  | 0.01 (-0.01-0.04)                | 0.04 ( 0.01-0.07)    | <b>0.04 ( 0.01- 0.08)</b>                   | 0.03 (-0.01- 0.08)                                    | 0.03 (-0.02- 0.09)                                    |

| <b>Variables</b>                     | <b>Crude</b>        | <b>Age, gender, race adjusted model</b> | <b>Final adjusted model</b> | <b>Final adjusted model with baseline HAQ &lt;0.5</b> | <b>Final adjusted model with baseline HAQ ≥0.5, but &lt;1.0</b> | <b>Final adjusted model with baseline HAQ ≥1.0, but &lt;3.0</b> |
|--------------------------------------|---------------------|-----------------------------------------|-----------------------------|-------------------------------------------------------|-----------------------------------------------------------------|-----------------------------------------------------------------|
| <b>Fibromyalgia</b>                  | 0.02 ( 0.00-0.03)   | 0.02 ( 0.01-0.04)                       | 0.06 ( 0.04-0.07)           | <b>0.05 ( 0.03- 0.07)</b>                             | <b>0.07 ( 0.04- 0.09)</b>                                       | <b>0.07 ( 0.03- 0.11)</b>                                       |
| <b>Chronic obstructive pulmonary</b> | 0.07 ( 0.04-0.10)   | 0.06 ( 0.03-0.09)                       | 0.07 ( 0.04-0.10)           | <b>0.10 ( 0.06- 0.14)</b>                             | <b>0.08 ( 0.02- 0.13)</b>                                       | 0.02 (-0.05- 0.08)                                              |
| <b>Practice Site Characteristics</b> |                     |                                         |                             |                                                       |                                                                 |                                                                 |
| <b>2-4</b>                           | -0.05 (-0.07--0.02) | -0.05 (-0.07--0.02)                     | -0.07 (-0.09--0.04)         | -0.02 (-0.04-0.00)                                    | -0.13 (-0.17--0.08)                                             | -0.12 (-0.19--0.06)                                             |
| <b>Solo</b>                          | 0.02 (-0.01-0.05)   | 0.02 (-0.01-0.05)                       | 0.02 (-0.01-0.05)           | -0.05 (-0.09--0.02)                                   | 0.10 ( 0.05- 0.16)                                              | 0.09 ( 0.01- 0.17)                                              |
| <b>5 or greater</b>                  | Ref                 | Ref                                     | Ref                         | Ref                                                   | Ref                                                             | Ref                                                             |
| <b>History of medications</b>        |                     |                                         |                             |                                                       |                                                                 |                                                                 |
| <b>NSAID</b>                         | -0.01 (-0.02-0.00)  | -0.01 (-0.02-0.01)                      | -0.01 (-0.02-0.01)          | -0.00 (-0.02-0.01)                                    | 0.01 (-0.02- 0.04)                                              | -0.02 (-0.06-0.02)                                              |
| <b>Opioids</b>                       | 0.02 ( 0.00-0.03)   | 0.01 (-0.00-0.03)                       | 0.08 ( 0.06-0.09)           | <b>0.05 ( 0.03- 0.06)</b>                             | <b>0.07 ( 0.05- 0.10)</b>                                       | <b>0.12 ( 0.09- 0.16)</b>                                       |
| <b>History of csDMARDs count</b>     |                     |                                         |                             |                                                       |                                                                 |                                                                 |
| <b>1</b>                             | -0.01 (-0.03-0.01)  | -0.01 (-0.03-0.01)                      | -0.01 (-0.03-0.01)          | -0.02 (-0.05-0.00)                                    | -0.01 (-0.05-0.03)                                              | 0.01 (-0.04- 0.07)                                              |
| <b>2</b>                             | -0.02 (-0.04-0.00)  | -0.02 (-0.04-0.00)                      | -0.02 (-0.04-0.01)          | -0.04 (-0.06--0.01)                                   | 0.00 (-0.04- 0.05)                                              | 0.00 (-0.06- 0.06)                                              |

| <b>Variables</b>                         | <b>Crude</b>        | <b>Age, gender, race adjusted model</b> | <b>Final adjusted model</b> | <b>Final adjusted model with baseline HAQ &lt;0.5</b> | <b>Final adjusted model with baseline HAQ ≥0.5, but &lt;1.0</b> | <b>Final adjusted model with baseline HAQ ≥1.0, but &lt;3.0</b> |
|------------------------------------------|---------------------|-----------------------------------------|-----------------------------|-------------------------------------------------------|-----------------------------------------------------------------|-----------------------------------------------------------------|
| <b>3</b>                                 | -0.05 (-0.08--0.02) | -0.05 (-0.08--0.02)                     | -0.06 (-0.09--0.03)         | -0.08 (-0.11--0.04)                                   | -0.01 (-0.06-0.05)                                              | -0.07 (-0.15-0.01)                                              |
| <b>4</b>                                 | -0.08 (-0.14--0.02) | -0.07 (-0.13--0.01)                     | -0.07 (-0.13--0.01)         | 0.01 (-0.06-0.08)                                     | -0.10 (-0.20--0.00)                                             | -0.12 (-0.27-0.02)                                              |
| <b>0</b>                                 | Ref                 | Ref                                     | Ref                         | Ref                                                   | Ref                                                             | Ref                                                             |
| <b>History of TNFi count</b>             |                     |                                         |                             |                                                       |                                                                 |                                                                 |
| <b>1</b>                                 | -0.01 (-0.03-0.00)  | -0.01 (-0.02-0.01)                      | 0.01 (-0.01-0.03)           | 0.01 (-0.01-0.03)                                     | 0.01 (-0.02- 0.04)                                              | -0.00 (-0.04-0.04)                                              |
| <b>2</b>                                 | -0.01 (-0.03-0.01)  | -0.00 (-0.03-0.02)                      | 0.02 (-0.00-0.05)           | 0.01 (-0.02-0.04)                                     | 0.02 (-0.02- 0.07)                                              | 0.03 (-0.03- 0.09)                                              |
| <b>3</b>                                 | 0.00 (-0.05-0.05)   | 0.01 (-0.04-0.06)                       | 0.03 (-0.02-0.08)           | -0.01 (-0.06-0.05)                                    | 0.08 (-0.00- 0.17)                                              | 0.04 (-0.08- 0.16)                                              |
| <b>4</b>                                 | -0.05 (-0.14-0.04)  | -0.04 (-0.13-0.05)                      | 0.01 (-0.08-0.10)           | -0.05 (-0.15-0.05)                                    | -0.07 (-0.26-0.11)                                              | 0.18 (-0.02- 0.38)                                              |
| <b>0</b>                                 | Ref                 | Ref                                     | Ref                         | Ref                                                   | Ref                                                             | Ref                                                             |
| <b>History of non-TNF biologic count</b> |                     |                                         |                             |                                                       |                                                                 |                                                                 |
| <b>1</b>                                 | -0.04 (-0.06--0.02) | -0.04 (-0.05--0.02)                     | -0.01 (-0.03-0.02)          | -0.00 (-0.03-0.02)                                    | -0.01 (-0.05-0.03)                                              | -0.02 (-0.07-0.04)                                              |
| <b>2</b>                                 | -0.05 (-0.09--0.01) | -0.05 (-0.09--0.01)                     | -0.00 (-0.04-0.04)          | 0.00 (-0.05-0.05)                                     | 0.02 (-0.05- 0.09)                                              | -0.02 (-0.10-0.07)                                              |

| <b>Variables</b>                    | <b>Crude</b>        | <b>Age, gender, race adjusted model</b> | <b>Final adjusted model</b> | <b>Final adjusted model with baseline HAQ &lt;0.5</b> | <b>Final adjusted model with baseline HAQ ≥0.5, but &lt;1.0</b> | <b>Final adjusted model with baseline HAQ ≥1.0, but &lt;3.0</b> |
|-------------------------------------|---------------------|-----------------------------------------|-----------------------------|-------------------------------------------------------|-----------------------------------------------------------------|-----------------------------------------------------------------|
| <b>3</b>                            | -0.06 (-0.15-0.02)  | -0.06 (-0.14-0.02)                      | 0.03 (-0.05-0.10)           | -0.00 (-0.12-0.12)                                    | 0.16 ( 0.02- 0.30)                                              | -0.00 (-0.15-0.15)                                              |
| <b>0</b>                            | Ref                 | Ref                                     | Ref                         | Ref                                                   | Ref                                                             | Ref                                                             |
| <b>Drug switch during follow-up</b> |                     |                                         |                             |                                                       |                                                                 |                                                                 |
| <b>Once</b>                         | -0.04 (-0.05--0.02) | -0.03 (-0.05--0.02)                     | -0.01 (-0.02-0.01)          | 0.02 ( 0.01- 0.04)                                    | 0.01 (-0.02- 0.03)                                              | -0.05 (-0.09--0.02)                                             |
| <b>Twice</b>                        | -0.01 (-0.04-0.01)  | -0.01 (-0.03-0.02)                      | 0.04 ( 0.01- 0.06)          | 0.04 ( 0.02- 0.07)                                    | 0.08 ( 0.04- 0.12)                                              | 0.01 (-0.04- 0.07)                                              |
| <b>3 times or more</b>              | -0.03 (-0.07-0.02)  | -0.02 (-0.06-0.03)                      | 0.06 ( 0.02- 0.10)          | 0.12 ( 0.07- 0.17)                                    | 0.05 (-0.03- 0.13)                                              | 0.06 (-0.03- 0.14)                                              |
| <b>Never</b>                        | Ref                 | Ref                                     | Ref                         | Ref                                                   | Ref                                                             | Ref                                                             |

\*identified using the 16 weeks of data prior to the index visit

§ All HAQ variants were normalized to a 0-3 scale. Patients were required to have the same type of HAQ measured at both index visit and outcome visit.



**Supplementary Table 2: Factors associated with Outpatient Infections**

| <b>Parameter</b>           | <b>Crude</b>            | <b>Age, sex, race-adjusted model</b> | <b>Final Adjusted Model</b> |
|----------------------------|-------------------------|--------------------------------------|-----------------------------|
| <b>Diabetes</b>            | <b>1.14 (1.05-1.23)</b> | <b>1.17 (1.08-1.27)</b>              | 0.99 (0.91-1.07)            |
| <b>Demographic Factors</b> |                         |                                      |                             |
| <b>Age</b>                 | 1.00 (1.00-1.00)        |                                      | 1.00 (0.99-1.00)            |
| <b>Male</b>                | 0.70 (0.65-0.76)        |                                      | 0.80 (0.74-0.87)            |
| <b>Race</b>                |                         |                                      |                             |
| <b>Black</b>               | 0.78 (0.69-0.88)        |                                      | 0.82 (0.73-0.93)            |
| <b>NA</b>                  | 1.03 (0.94-1.12)        |                                      | 1.04 (0.95-1.13)            |
| <b>Other</b>               | 0.78 (0.68-0.89)        |                                      | 0.95 (0.83-1.09)            |
| <b>White</b>               | Ref                     | Ref                                  | Ref                         |
| <b>Glucocorticoid use</b>  |                         |                                      |                             |
| <b>Glucocorticoid use</b>  | <b>1.69 (1.56-1.82)</b> | <b>1.69 (1.57-1.82)</b>              | <b>1.18 (1.09-1.28)</b>     |
| <b>Combined_cDMARDs</b>    |                         |                                      |                             |
| <b>Combined_cDMARDs</b>    | 0.78 (0.73-0.83)        | 0.79 (0.74-0.84)                     | 1.02 (0.94-1.09)            |
| <b>Adalimumab</b>          | 0.99 (0.87-1.13)        | 0.99 (0.87-1.14)                     | 1.16 (1.00-1.35)            |
| <b>Etanercept</b>          | 0.97 (0.86-1.10)        | 0.97 (0.86-1.10)                     | 1.14 (1.00-1.30)            |
| <b>Infliximab</b>          | 1.03 (0.92-1.15)        | 1.03 (0.92-1.15)                     | 1.08 (0.95-1.22)            |
| <b>Certolizumab</b>        | 1.20 (0.99-1.47)        | 1.19 (0.98-1.45)                     | 1.26 (1.03-1.55)            |
| <b>Golimumab</b>           | 0.87 (0.69-1.09)        | 0.86 (0.69-1.07)                     | 0.83 (0.66-1.05)            |
| <b>Abatacept</b>           | <b>1.32 (1.17-1.49)</b> | <b>1.29 (1.15-1.46)</b>              | 1.11 (0.96-1.29)            |
| <b>Rituximab</b>           | <b>1.66 (1.40-1.97)</b> | <b>1.64 (1.39-1.95)</b>              | 1.22 (1.00-1.48)            |
| <b>Tocilizumab</b>         | <b>1.21 (1.04-1.41)</b> | <b>1.17 (1.01-1.37)</b>              | 0.95 (0.79-1.13)            |
| <b>Tofacitinib</b>         | <b>1.21 (1.01-1.46)</b> | 1.18 (0.98-1.42)                     | 1.16 (0.96-1.41)            |
| <b>Health Insurance</b>    |                         |                                      |                             |
| <b>Medicare</b>            |                         |                                      |                             |
| <b>Yes</b>                 | <b>1.24 (1.16-1.33)</b> | <b>1.39 (1.28-1.51)</b>              | <b>1.20 (1.10-1.30)</b>     |
| <b>Missing</b>             | <b>1.15 (1.02-1.28)</b> | <b>1.15 (1.02-1.29)</b>              | <b>1.32 (1.07-1.63)</b>     |
| <b>No</b>                  | Ref                     | Ref                                  | Ref                         |
| <b>Medicaid</b>            |                         |                                      |                             |
| <b>Yes</b>                 | <b>1.35 (1.16-1.56)</b> | <b>1.38 (1.19-1.61)</b>              | 1.12 (0.96-1.31)            |

| Parameter                            | Crude                   | Age, sex, race-adjusted model | Final Adjusted Model    |
|--------------------------------------|-------------------------|-------------------------------|-------------------------|
| No                                   | Ref                     | Ref                           | Ref                     |
| <b>Commercial/Other</b>              |                         |                               |                         |
| Yes                                  | 1.03 (0.87-1.21)        | 1.00 (0.85-1.17)              | <b>1.28 (1.07-1.52)</b> |
| No                                   | Ref                     | Ref                           | Ref                     |
| <b>US Region</b>                     |                         |                               |                         |
| Midwest                              | 0.82 (0.75-0.88)        | 0.82 (0.75-0.88)              | <b>1.16 (1.07-1.27)</b> |
| NA                                   | 0.92 (0.78-1.09)        | 0.92 (0.78-1.08)              | 1.26 (0.78-2.04)        |
| Northeast                            | 0.86 (0.63-1.17)        | 0.85 (0.62-1.16)              | 0.99 (0.84-1.17)        |
| West                                 | 1.09 (0.68-1.76)        | 1.09 (0.68-1.76)              | 0.81 (0.59-1.10)        |
| South                                | Ref                     | Ref                           | Ref                     |
| <b>Comorbidities</b>                 |                         |                               |                         |
| Previous infection                   | <b>4.43 (4.14-4.74)</b> | <b>4.36 (4.08-4.67)</b>       | <b>4.06 (3.77-4.36)</b> |
| Depression                           | <b>1.79 (1.61-1.99)</b> | <b>1.71 (1.54-1.90)</b>       | <b>1.30 (1.16-1.45)</b> |
| Fibromyalgia                         | <b>1.41 (1.31-1.52)</b> | <b>1.34 (1.25-1.45)</b>       | 1.02 (0.94-1.10)        |
| Chronic obstructive pulmonary        | <b>2.56 (2.31-2.85)</b> | <b>2.59 (2.33-2.88)</b>       | <b>1.58 (1.42-1.76)</b> |
| <b>Practice Site Characteristics</b> |                         |                               |                         |
| 2-4                                  | 0.96 (0.85-1.07)        | 0.96 (0.85-1.07)              | 0.96 (0.85-1.08)        |
| Solo                                 | <b>1.33 (1.18-1.51)</b> | <b>1.33 (1.18-1.51)</b>       | <b>1.48 (1.29-1.71)</b> |
| 5 or greater                         | Ref                     | Ref                           | Ref                     |
| <b>History of medications, %</b>     |                         |                               |                         |
| NSAID                                | <b>1.35 (1.25-1.46)</b> | <b>1.34 (1.24-1.45)</b>       | 1.01 (0.94-1.10)        |
| Opioid                               | <b>1.67 (1.57-1.78)</b> | <b>1.66 (1.56-1.77)</b>       | <b>1.15 (1.07-1.23)</b> |
| Antidepressants                      | <b>1.45 (1.36-1.54)</b> | <b>1.38 (1.29-1.47)</b>       | 1.00 (0.93-1.08)        |
| <b>History of csDMARDs count</b>     |                         |                               |                         |
| 1                                    | 0.91 (0.83-1.01)        | 0.92 (0.83-1.02)              | 0.92 (0.82-1.03)        |
| 2                                    | 1.05 (0.94-1.17)        | 1.04 (0.93-1.16)              | 0.89 (0.79-1.00)        |
| 3                                    | 1.24 (1.07-1.43)        | 1.22 (1.06-1.41)              | 0.91 (0.78-1.07)        |
| 4                                    | 1.29 (0.99-1.69)        | 1.28 (0.98-1.68)              | 0.87 (0.66-1.16)        |
| 0                                    | Ref                     | Ref                           | Ref                     |

| <b>Parameter</b>                         | <b>Crude</b>            | <b>Age, sex, race-adjusted model</b> | <b>Final Adjusted Model</b> |
|------------------------------------------|-------------------------|--------------------------------------|-----------------------------|
| <b>History of TNFi count</b>             |                         |                                      |                             |
| <b>1</b>                                 | <b>1.16 (1.08-1.24)</b> | <b>1.16 (1.08-1.24)</b>              | 0.97 (0.89-1.05)            |
| <b>2</b>                                 | <b>1.38 (1.24-1.53)</b> | <b>1.37 (1.23-1.52)</b>              | 0.93 (0.82-1.05)            |
| <b>3</b>                                 | <b>1.26 (1.01-1.58)</b> | 1.22 (0.97-1.52)                     | 0.76 (0.59-0.96)            |
| <b>4</b>                                 | 1.33 (0.87-2.02)        | 1.31 (0.86-2.00)                     | 0.78 (0.51-1.21)            |
| <b>0</b>                                 | Ref                     | Ref                                  | Ref                         |
| <b>History of non-TNF biologic count</b> |                         |                                      |                             |
| <b>1</b>                                 | <b>1.45 (1.34-1.56)</b> | <b>1.42 (1.31-1.53)</b>              | 1.09 (0.98-1.22)            |
| <b>2</b>                                 | <b>1.62 (1.39-1.88)</b> | <b>1.55 (1.33-1.81)</b>              | 0.98 (0.82-1.18)            |
| <b>3</b>                                 | <b>1.94 (1.42-2.65)</b> | <b>1.85 (1.35-2.52)</b>              | 0.98 (0.70-1.37)            |
| <b>0</b>                                 | Ref                     | Ref                                  | Ref                         |
| <b>Drug switch during follow-up</b>      |                         |                                      |                             |
| <b>Once</b>                              | <b>1.15 (1.07-1.24)</b> | <b>1.15 (1.07-1.24)</b>              | <b>1.18 (1.09-1.27)</b>     |
| <b>Twice</b>                             | <b>1.28 (1.15-1.43)</b> | <b>1.28 (1.14-1.43)</b>              | <b>1.24 (1.11-1.40)</b>     |
| <b>3 times or more</b>                   | <b>1.55 (1.29-1.88)</b> | <b>1.56 (1.29-1.88)</b>              | <b>1.49 (1.23-1.81)</b>     |
| <b>Never</b>                             | Ref                     | Ref                                  | Ref                         |
| <b>CDAI (remission referent)</b>         |                         |                                      |                             |
| <b>Low</b>                               | <b>1.33 (1.14-1.56)</b> | <b>1.32 (1.13-1.55)</b>              | 1.16 (0.99-1.36)            |
| <b>Moderate</b>                          | <b>1.70 (1.44-2.00)</b> | <b>1.67 (1.42-1.97)</b>              | <b>1.28 (1.08-1.52)</b>     |
| <b>High</b>                              | <b>2.27 (1.89-2.72)</b> | <b>2.25 (1.88-2.70)</b>              | <b>1.53 (1.27-1.85)</b>     |
| <b>Missing</b>                           | <b>1.84 (1.59-2.14)</b> | <b>1.83 (1.58-2.13)</b>              | <b>1.37 (1.18-1.59)</b>     |
